# Supplementary material for: Lineage-Specific Chiral Biases of Human Embryonic Stem Cells during Differentiation
Source: Hindawi journal article supplement (doi:10.1155/2018/1848605), 2018-12-02
Supplement: f1 [file 1848605.f1.zip]

## Supplementary Materials

Table S1. Antibodies used for characterization of hESC pluripotency and differentiation efficiencies.

| Antibody                              | Cell Stage                                | Manufacturer                            | Catalog # | Concentration |
|---------------------------------------|-------------------------------------------|-----------------------------------------|-----------|---------------|
| Oct4                                  | hESC                                      | Abcam                                   | ab184665  | 1:100         |
| SOX2                                  | hESC                                      | Cell Signaling Technology               | 3579S     | 1:400         |
| Nanog                                 | hESC                                      | Thermo Fisher                           | MA1-017   | 1:200         |
| SOX17                                 | definitive endoderm                       | GeneTex                                 | GTX83582  | 1:100         |
| FOXA2                                 | definitive endoderm                       | GeneTex                                 | GTX62638  | 1:250         |
| CDX2                                  | mid/hindgut                               | GeneTex                                 | GTX113160 | 1:200         |
| Brachyury                             | mesoendoderm                              | R&D Systems                             | AF2085    | 1:100         |
| Nkx2.5                                | cardiac mesoderm &<br>cardiac progenitors | Santa Cruz<br>Biotechnology             | sc-376565 | 1:100         |
| Isl1                                  | cardiac progenitors                       | Developmental Studies<br>Hybridoma Bank | 39.4D5    | 1:20          |
| cTnt                                  | cardiomyocytes                            | Thermo Fisher                           | MS295P1   | 1:200         |
| OTX2                                  | neural lineages                           | R&D Systems                             | AF1979    | 10 µg/mL      |
| PAX6                                  | neuroepithelium                           | GeneTex                                 | GTX113241 | 1:200         |
| Secondary antibodies                  |                                           |                                         |           |               |
|                                       |                                           |                                         |           |               |
| Alexa Flour 594 Goat anti-Mouse IgG2b |                                           | Thermo Fisher                           | A-21145   | 1:500         |
| Alexa Flour 488 Goat anti-Mouse IgG1  |                                           | Thermo Fisher                           | A-21121   | 1:500         |
| Alexa Flour 488 Goat anti-Mouse IgG   |                                           | Thermo Fisher                           | A-11001   | 1:500         |
| Alexa Flour 568 Goat anti-Rabbit IgG  |                                           | Thermo Fisher                           | A-11011   | 1:500         |
| Alexa Flour 568 Donkey anti-Goat IgG  |                                           | Thermo Fisher                           | A-11057   | 1:500         |

Table S2. Differentiation and pluripotency marker efficiencies for each differentiation stage of interest. Anticipated efficiencies were obtained through previously published studies which utilized these differentiation protocols [17-20].

| Cell Stage                 | Marker(s)      | Anticipated Efficiency | Number of Cells Evaluated | Actual Efficiency |
|----------------------------|----------------|------------------------|---------------------------|-------------------|
| hESCs                      |                |                        |                           |                   |
| RUES2                      | OCT4           | > 95%                  | N = 2,263                 | 96.5 %            |
|                            | SOX2           | > 95%                  | N = 1,405                 | 95.9%             |
|                            | Nanog          | > 95%                  | N = 1,336                 | 97.1%             |
| Intestinal Lineages        |                |                        |                           |                   |
| Day 3: Endoderm            | SOX17<br>FOXA2 | > 85% double stained   | N = 2,045                 | 61.0 %            |
| Day 7: Mid/Hindgut         | CDX2           | > 90%                  | N = 1,937                 | 63.8 %            |
| Cardiac Linages            |                |                        |                           |                   |
| Day 1: Mesoendoderm        | Brachyury      | > 90%                  | N = 1,186                 | 88.7 %            |
| Day 5: Cardiac Mesoderm    | Nkx2.5         | > 50%                  | N = 256                   | 98.0 %            |
| Day 8: Cardiac Progenitors | Nkx2.5         | > 90%                  | N = 763                   | 90.0 %            |
|                            | Isl1           | > 90%                  | N = 843                   | 84.4 %            |
| Day 15: Cardiomyocytes     | cTnt           | > 80%                  | N = 2603                  | 80.9 %            |
| Neural Lineages            |                |                        |                           |                   |
| Day 5: Intermediate        | OTX2           | > 50%                  | N = 372                   | 78.7 %            |
| Day 10: Neuroepithelium    | PAX6           | > 90%                  | N = 537                   | 94.6 %            |
|                            | OTX2           | > 90%                  | N = 198                   | 91.9 %            |

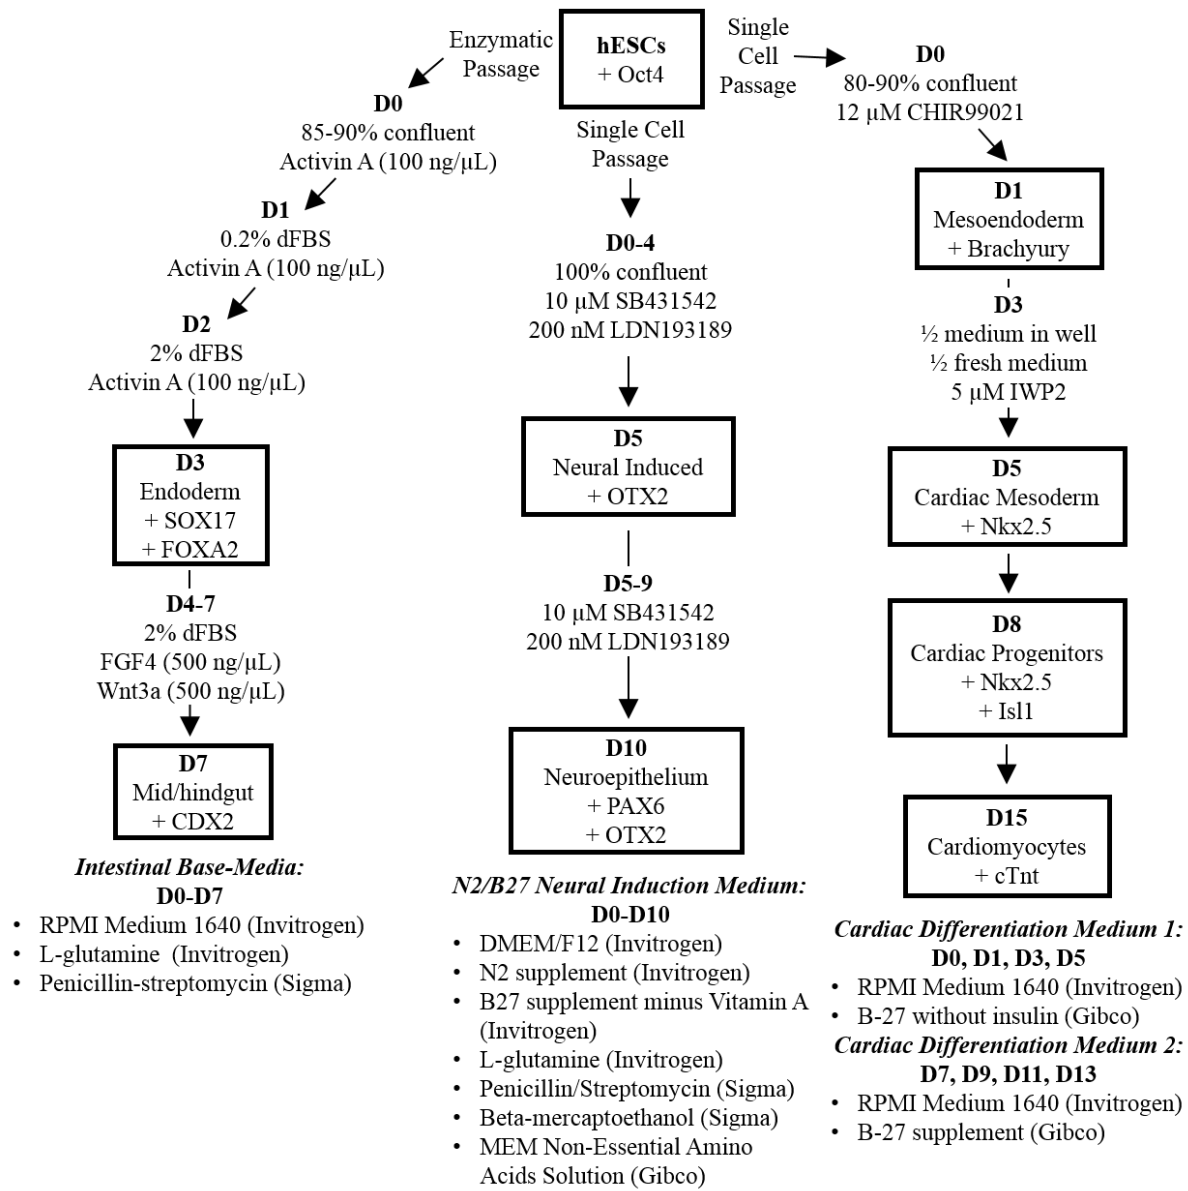

Figure S1. Differentiation of hESCs down three lineages: mid/hindgut on the left, neuroepithelium in the middle and cardiomyocytes on the right. The flow chart shows the type of passaging, level of confluence prior to differentiation, base medium compositions, feeding days and small molecule supplements. The boxes indicate the stages of interest used in this study along with efficiency markers.

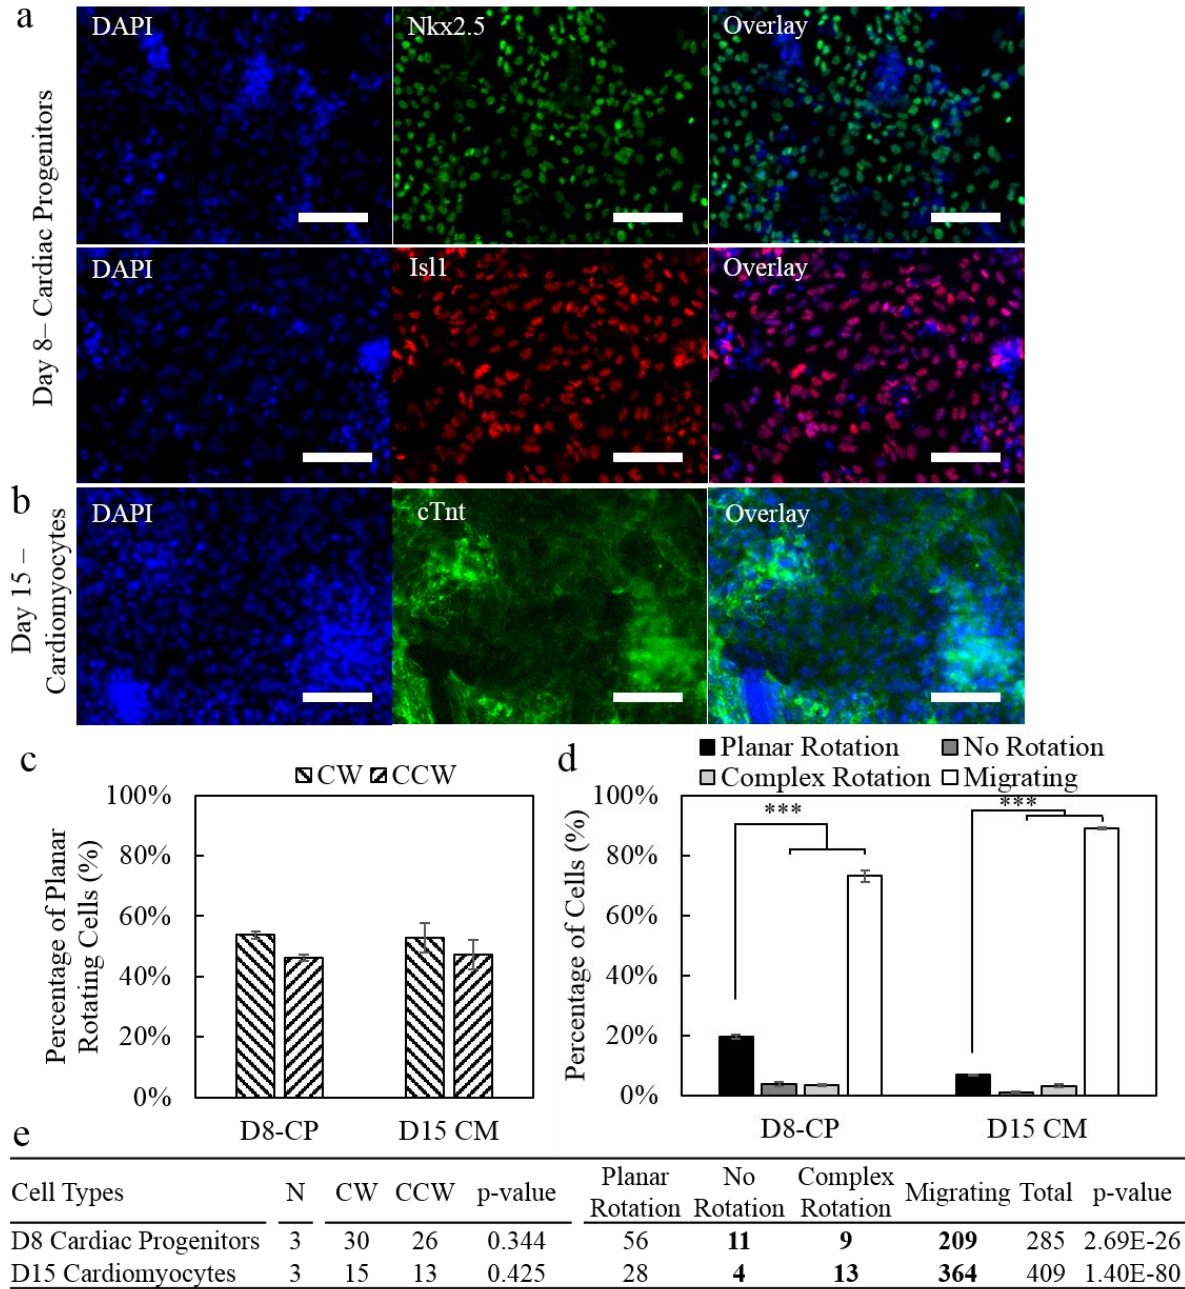

Figure S2. Later stages of the cardiac lineage show slight CW bias, but are too migratory for accurate evaluation. a) Day 8 cardiac progenitor cells expressing Nkx2.5 and Isl1. b) Day 15 cardiomyocytes expressing cardiac troponin (cTnt). c) Cardiac progenitors (D8-CP) and cardiomyocytes (D15 CM) show slight CW bias which is not statistically significant. d) Both cardiac progenitors and cardiomyocytes exhibit a primarily migratory behavior, significantly decreasing the number of planar rotating cells. e) Quantitative data showing the number of cells in each category along with the number of replicate experiments (N). The p-values indicate comparisons between CW and CCW and between planar rotation and the other three categories. Scale Bars: 100  $\mu$ m; \*\*\*  $p < 0.001$

a

| Stage of Interest                                                    | Marker(s)      | Number of Cells<br>Evaluated | Efficiency |
|----------------------------------------------------------------------|----------------|------------------------------|------------|
| <b>Intestinal Lineages – Staining of 3D Matrigel Bilayer Samples</b> |                |                              |            |
| Day 3: Endoderm                                                      | SOX17<br>FOXA2 | N = 227                      | 85.0 %     |
| Day 7: Mid/Hindgut                                                   | CDX2           | N = 456                      | 87.2 %     |

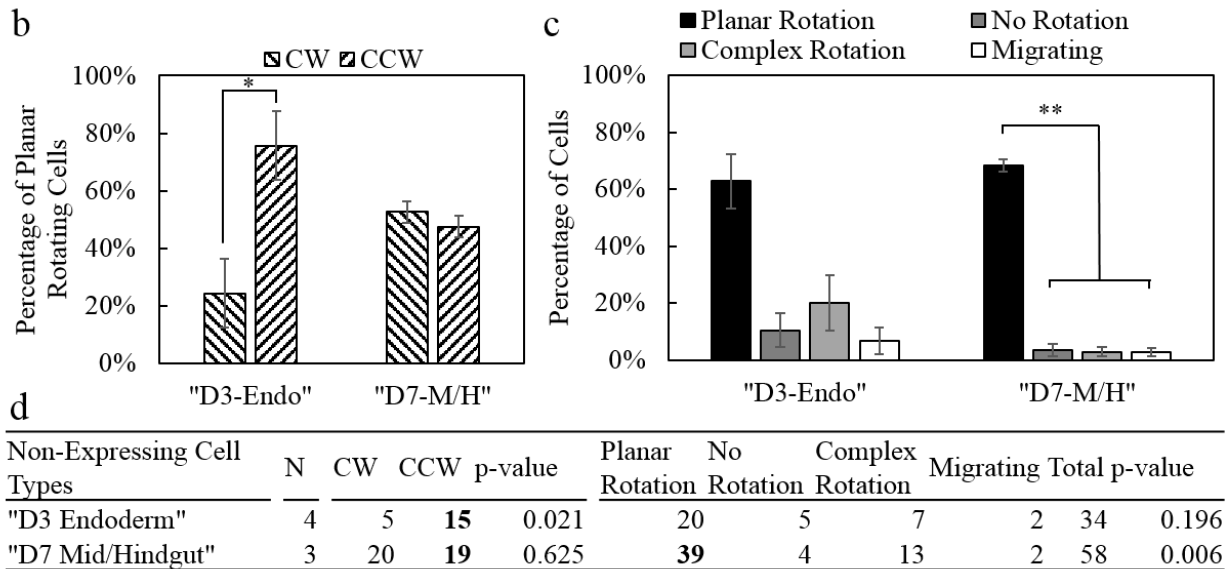

Figure S3. Non-expressing cells from endoderm and mid/hindgut differentiations. a) Differentiation marker efficiencies for each endoderm and mid/hindgut stages of interest after seeding into the 3D Matrigel bilayer system. b) Cells that did not show dual expressing of endoderm differentiation markers showed a statistically significant CCW rotational bias, but cells that did not express mid/hindgut marker CDX2 showed no chiral bias. c) The non-expressing cells for the mid/hindgut lineage display a significant difference between planar rotating cells and the other categories. d) Quantitative data showing the number of cells in each category along with the number of replicate experiments (N). The p-values indicate comparisons between CW and CCW and between planar rotation and the other three categories. \*  $p < 0.05$ , \*\*  $p < 0.01$

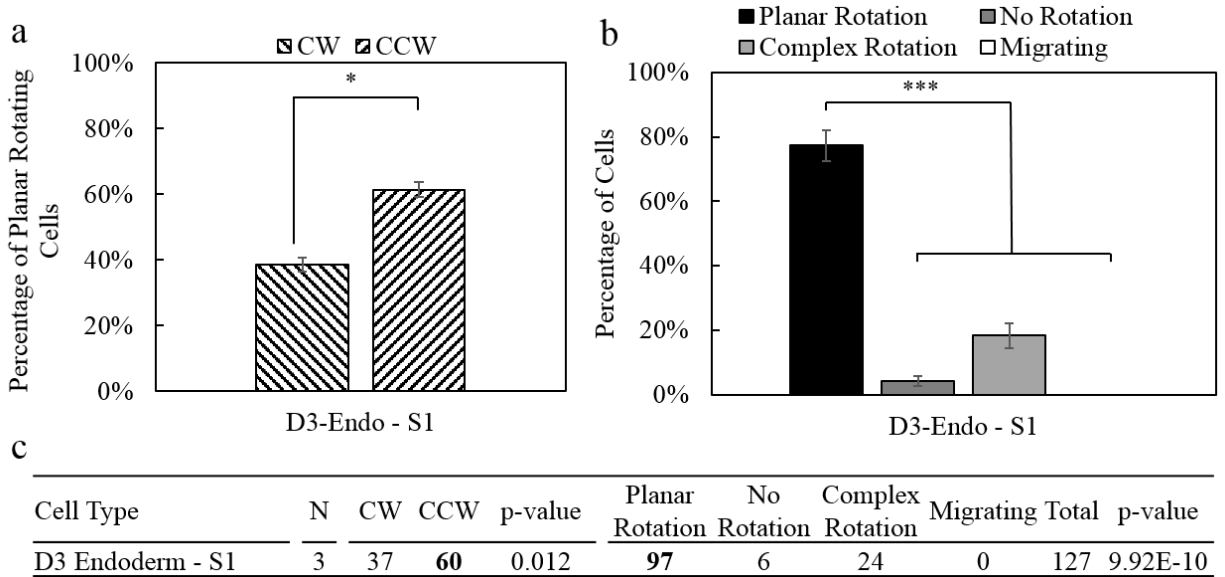

Figure S4. Endoderm derived using an alternative differentiation protocol (Pagliuca *Cell* 2014; Rezanian *Nat Biotechnol* 2014) also displays a CCW bias. a) Endoderm derived using this protocol (D3-Endo – S1) displays statistically significant CCW rotational bias. b) This endoderm shows significantly more planar rotating cells than other categories. c) Quantitative data showing the number of cells in each category along with the number of replicate experiments (N). The p-values indicate comparisons between CW and CCW and between planar rotation and the other three categories. \*  $p < 0.05$ ; \*\*\*  $p < 0.001$  Reference: Pagliuca FW, *et al.* (2014) Generation of functional human pancreatic beta cells in vitro. *Cell* 159(2):428-439. Rezanian A, *et al.* (2014) Reversal of diabetes with insulin-producing cells derived in vitro from human pluripotent stem cells. *Nat Biotechnol* 32(11):1121-1133.

## Movie Captions

Video S1. A phase contrast video of a single RUES2 cell rotating counterclockwise over the course of an hour.

Video S2. A tracked version of Video S1, showing a RUES2 cell rotating counterclockwise over the course of an hour.

Video S3. A phase contrast video of a single RUES2 cell rotating clockwise over the course of an hour.

Video S4. A tracked version of Video S3, showing a RUES2 cell rotating clockwise over the course of an hour.

Video S5. A phase contrast video of a single RUES2 cell undergoing out of plane complex rotation over the course of an hour.

Video S6. A tracked version of Video S5, showing a RUES2 cell undergoing out of plane complex rotation over the course of an hour.

Video S7. A phase contrast video of a single RUES2 cell undergoing switching complex rotation over the course of an hour.

Video S8. A tracked version of Video S7, showing a RUES2 cell undergoing switching complex rotation over the course of an hour.

Video S9. A phase contrast video of a single RUES2 cell migrating over the course of an hour.

Video S10. A phase contrast video of a single RUES2 cell undergoing no rotation over the course of an hour.

Video S11. An instructional video detailing how to manually analyze the 3D rotation of cells embedded in the 3D Matrigel bilayer system using ImageJ.
