# Supplementary material for: Lineage-Specific Chiral Biases of Human Embryonic Stem Cells during Differentiation
Source: Stem Cells Int. 2018 Dec 2;2018:1848605. doi: 10.1155/2018/1848605 (PMC6304839; doi:10.1155/2018/1848605)
Supplement: Supplementary Materials — The supplemental materials contain information detailing the differentiation protocols, the antibody information including catalogue numbers and concentrations used for immunostaining, tables describing differentiation efficiencies for each stage, and the 3D bilayer rotation data corresponding to D8 cardiac progenitors and D15 cardiomyocytes. Videos showing the different categories (CW, CCW, no rotation, complex, and migrating) used for analysis are also included. [file 1848605.f1.zip]

Archive with 12 entries (12 files):
- Supplemental/Supplemental_Differentiation_Manuscript_09192018.pdf
- Supplemental/Video_S1_CCW_Rotation.avi
- Supplemental/Video_S10_No_Rotation.avi
- Supplemental/Video_S11_Training.wmv
- Supplemental/Video_S2_CCW_Rotation_Tracked.avi
- Supplemental/Video_S3_CW_Rotation.avi
- Supplemental/Video_S4_CW_Rotation_Tracked.avi
- Supplemental/Video_S5_OutofPlane_Complex.avi
- Supplemental/Video_S6_OutofPlane_Complex_Tracked.avi
- Supplemental/Video_S7_Switching_Complex.avi
- Supplemental/Video_S8_Switching_Complex_Tracked.avi
- Supplemental/Video_S9_Migrating.avi
